# Supplementary material
Source: PubMed Central journal article supplement (PMC4207200)
Supplement: supp_dc14-0525v140525_DC140525SupplementaryData.pdf [file supp_dc14-0525v140525_DC140525SupplementaryData.pdf]

## SUPPLEMENTARY DATA

### *fMRI Data Acquisition*

Images were obtained using a 3-T Siemens Trio MRI system equipped with a standard quadrature head coil, using T2\*-sensitive gradient-recalled single shot echo planar pulse sequence. Adolescents were positioned in the coil and head movements were minimized using foam pillows. After a 3-plane localizer, a high resolution 3D volume was collected using a Magnetization Prepared Rapid Gradient Echo (MPRAGE) sequence (176 contiguous sagittal slices, TR=2530 ms; echo time (TE)=2.4 ms; bandwidth=238 Hz/pixel; flip angle (FA)= 9°; slice thickness=1mm; field of view=256 x 256 mm; matrix=256 x 256). Next, a T1-weighted anatomical scan (TR=300 ms; TE=2.46 ms; bandwidth=310 Hz/pixel; FA= 60°; slice thickness=4mm; FOV=220 x 220 mm; matrix=256 x 256) was collected with 32 axialoblique slices parallel to the anterior and posterior commissure (AC-PC). After these structural images, six functional data series were then acquired with the same slice localizations as the axialoblique T1-weighted image. Functional images were collected using a T2\* sensitive gradient-recalled single-shot echo-planar pulse sequence (TR=2000 ms; TE=25 ms; bandwidth=2520 Hz/pixel; FA=85°; slice thickness=4mm; FOV=220 x 220 mm; matrix=64 x 64; images per slice=198). Stimuli were projected onto a semi-transparent screen at the head of the bore, viewed by the subject via a mirror mounted on the head coil.

### *fMRI Data Preprocessing*

All data were converted from Digital Imaging and Communication in Medicine (DICOM) format to analyze format using XMedCon (1). During the conversion process, the first three images of each run were discarded to enable the signal to achieve steady-state equilibrium between radio frequency pulsing and relaxation leaving 195 images per slice for analysis. Functional images were slice time corrected using sinc interpolation and motion corrected using SPM5 ([www.fil.ion.ucl.ac.uk/spm/software/spm5](http://www.fil.ion.ucl.ac.uk/spm/software/spm5)) for three translational directions (x, y or z) and three possible rotations (pitch, yaw or roll). Trials with linear motion that had a displacement in excess of 1.5 mm or rotation in excess of 2° were rejected. All further analyses were performed using BioImage Suite (<http://bioimagesuite.org>). Individual subject data was analyzed using a General Linear Model (GLM) on each voxel in the entire brain volume with regressors specific for each task, High-calorie food (HCF), Low-calorie food (LCF), and Non-food (NF) with drift parameters regressed from the data (mean, linear and quadratic). The resulting output images for each task were normalized beta-maps, which were in the acquired space (3.438mm x 3.438mm x 4mm) and were spatially smoothed with a 6 mm Gaussian kernel to account for variations in the location of activation across subjects.

### *Image Registrations*

To take these data into a common reference space, three registrations were calculated within the Yale BioImage Suite software package ([http://www.bioimagesuite.org/\(2\)](http://www.bioimagesuite.org/(2))). The first registration performed a linear registration between the individual subject's raw functional image and that subject's 2D anatomical image. The 2D anatomical image was then linearly registered to the individual's 3D anatomical image. The 3D differs from the 2D in that it has a 1×1×1 mm resolution whereas the 2D z-dimension is set by slice-thickness and its x-y dimensions are set by voxel size. Finally, a non-linear registration was computed between the individual 3D anatomical image and a commonly used 3D reference image (the Colin Brain (3) in MNI space (4)). All three registrations were applied sequentially to the individual normalized beta-maps to bring all data into the common reference space.

SUPPLEMENTARY DATA

**Supplementary Figure 1. Insulin resistance and leptin levels in the Obese and Lean groups.** The Obese adolescents demonstrate a wide spectrum of (a) leptin levels, (b) insulin levels, (c) insulin resistance (assessed by WBISI) with statistically significant differences between the two groups.

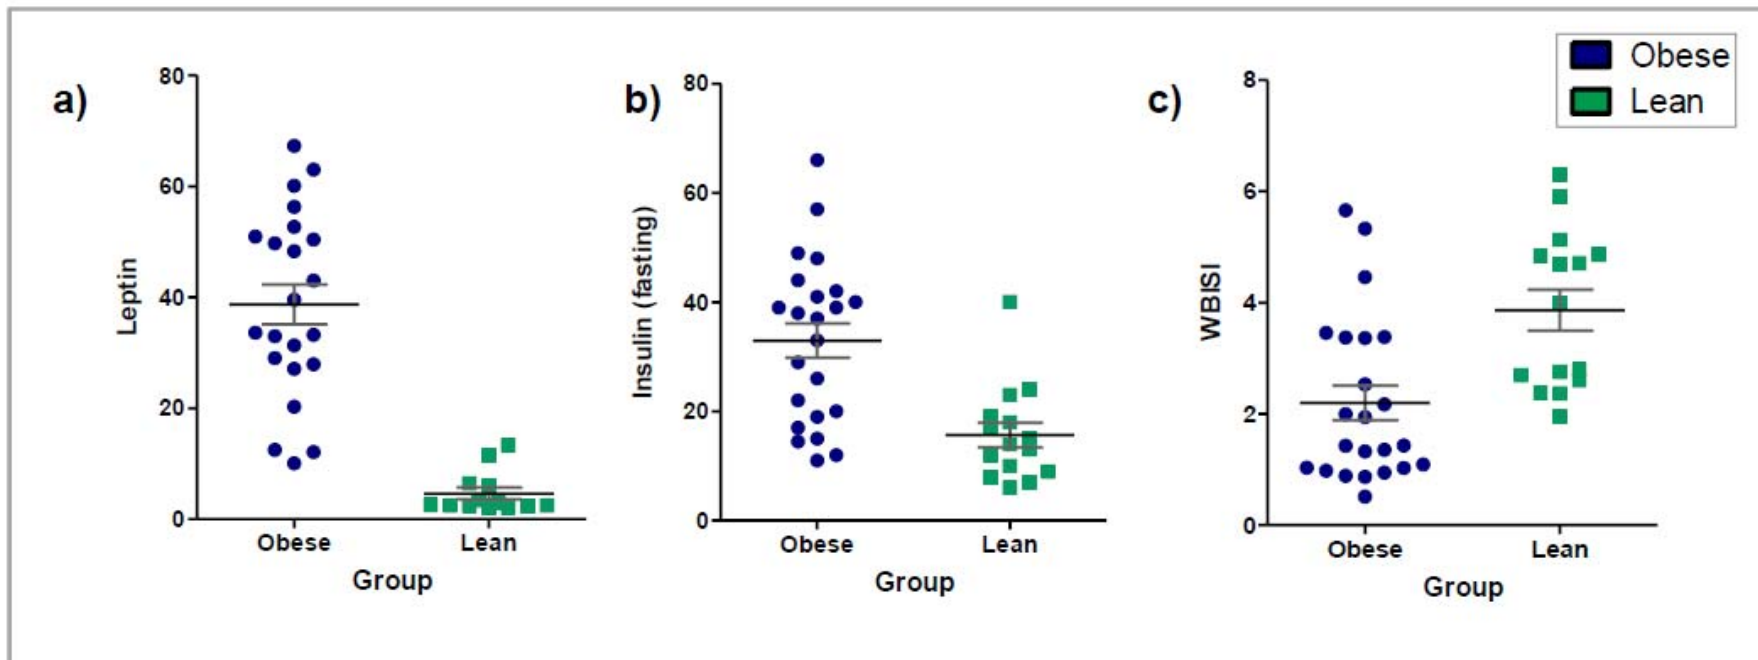

SUPPLEMENTARY DATA

**Supplementary Figure 2. Liking and wanting in Obese and Lean groups.** Subjective liking and wanting ratings for HCF, LCF, and NF pictures presented during the fMRI session were not different in Obese as compared to Lean adolescents. There were statistically significant differences between condition response (Wanting: HCF vs. NF  $p < 0.0001$ , HCF vs. LCF  $p = 0.0001$ , LCF vs. NF  $p = 0.0013$ ; Liking: HCF vs. NF  $p < 0.0001$ , HCF vs. LCF  $p < 0.0001$ , LCF vs. NF  $p = 0.023$ ).

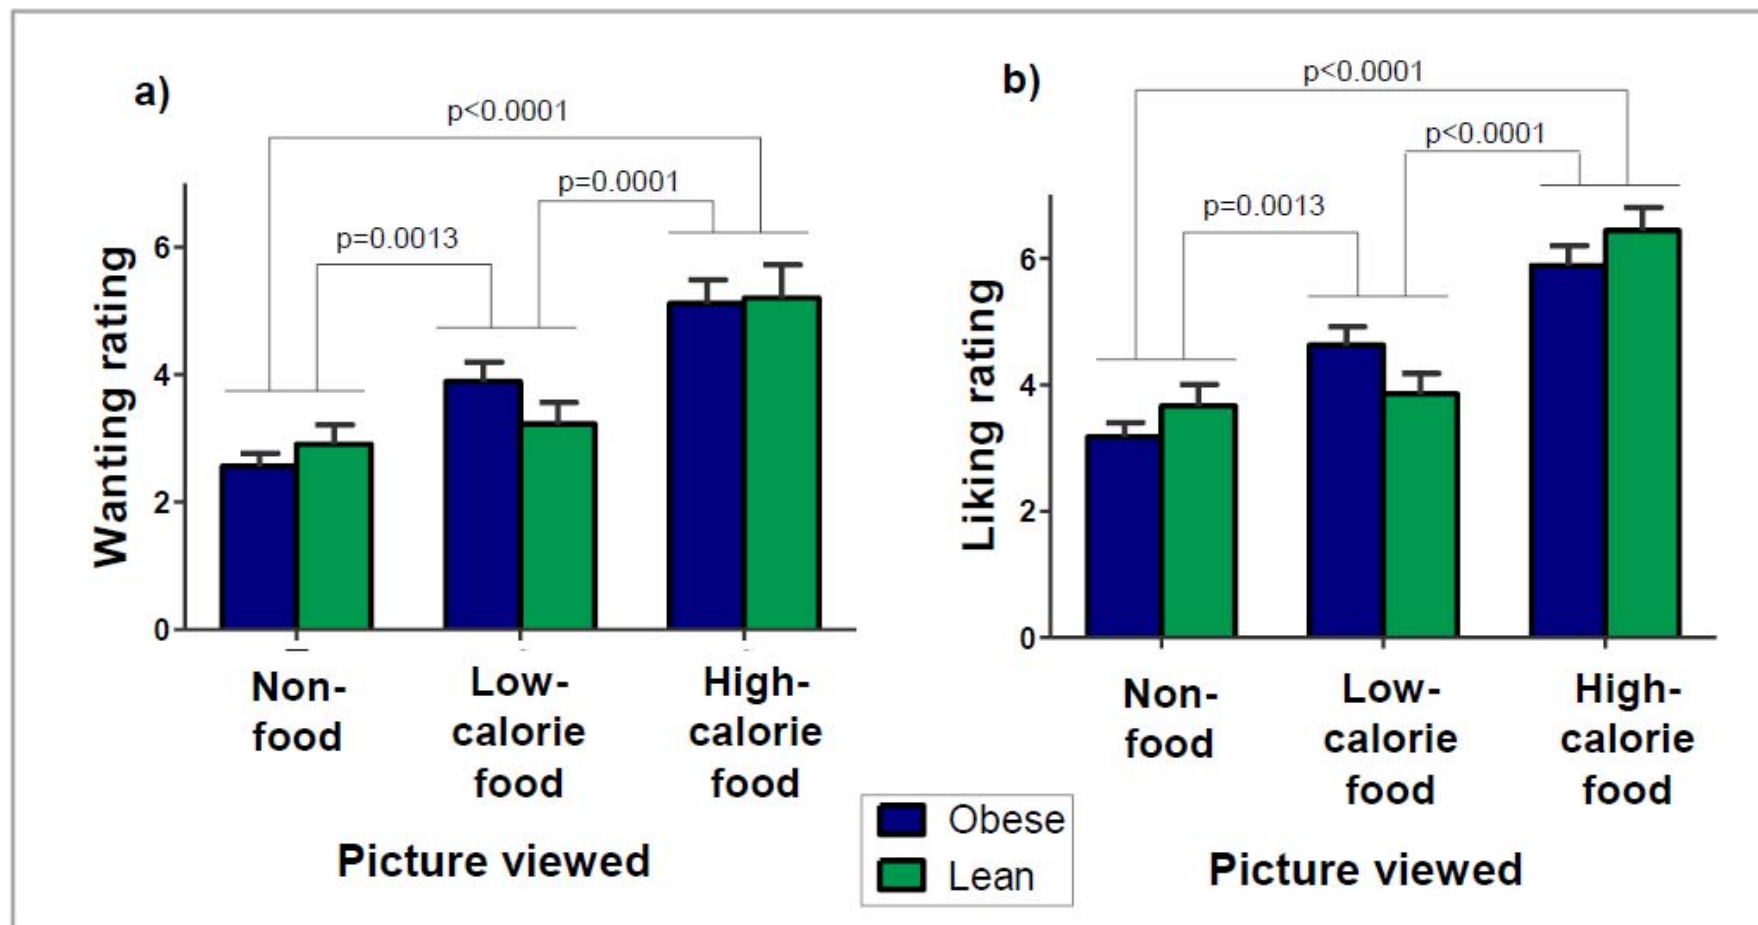

SUPPLEMENTARY DATA

**Supplementary Figure 3. Within-group neural response differences in cue condition contrasts.** Axial brain slices of neural activation differences in low-calorie food vs non-food in (a) Obese (b) Lean (c) Obese compared to Lean adolescents (threshold of  $p < 0.05$ , FWE-corrected). R, right; L, left; FWE, family-wise-error. Talairach z-levels indicated.

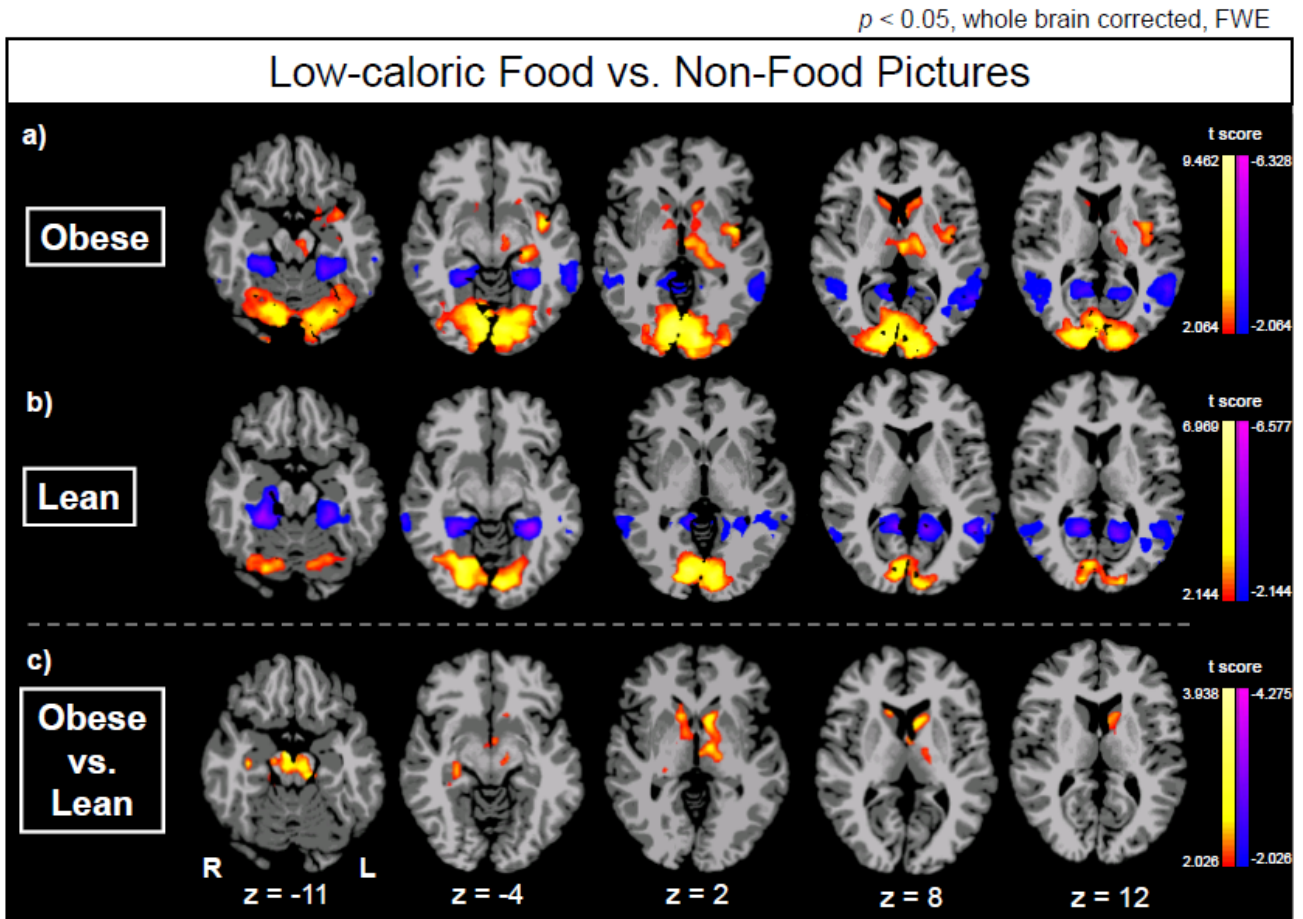

SUPPLEMENTARY DATA

**Supplementary Figure 4. Within-group neural response differences in cue condition contrasts** covaried for age, sex, and race. Axial brain slices of neural activation differences in high-calorie food vs. non-food in Obese compared to Lean adolescents (threshold of  $p < 0.05$ , FWE-corrected). R, right; L, left; FWE, family-wise-error. Talairach z-levels indicated.

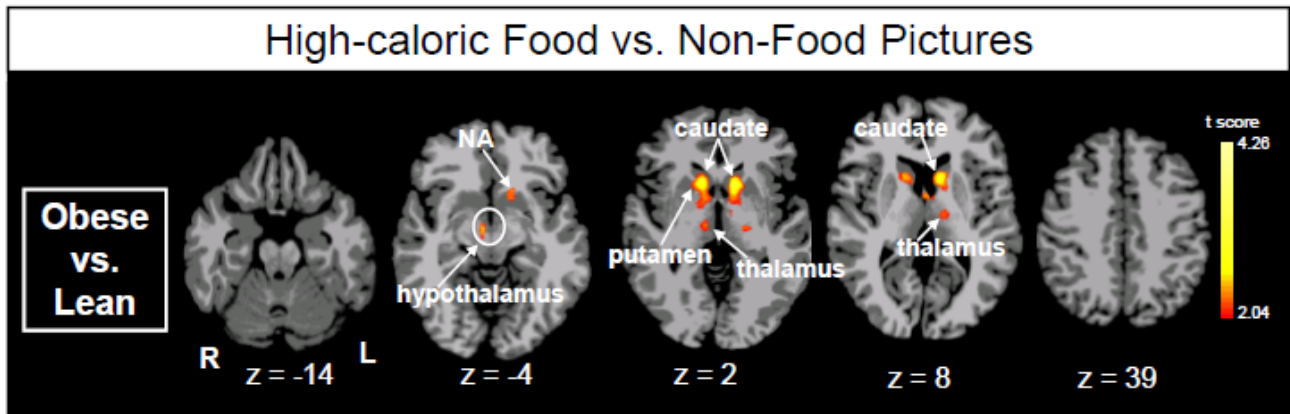

SUPPLEMENTARY DATA

**Supplementary Figure 5. Beta-weight (BOLD signal) extracted from regions of interest (ROIs).** There were no statistically significant differences between the Obese-IR and Obese-IS groups in terms of BOLD signal response in the identified regions of interest. There were statistically significant differences between the Obese-IR vs. Lean and the Obese-IS vs. Lean groups in each of the ROIs.  $P < 0.05$ , whole brain corrected ROIs.

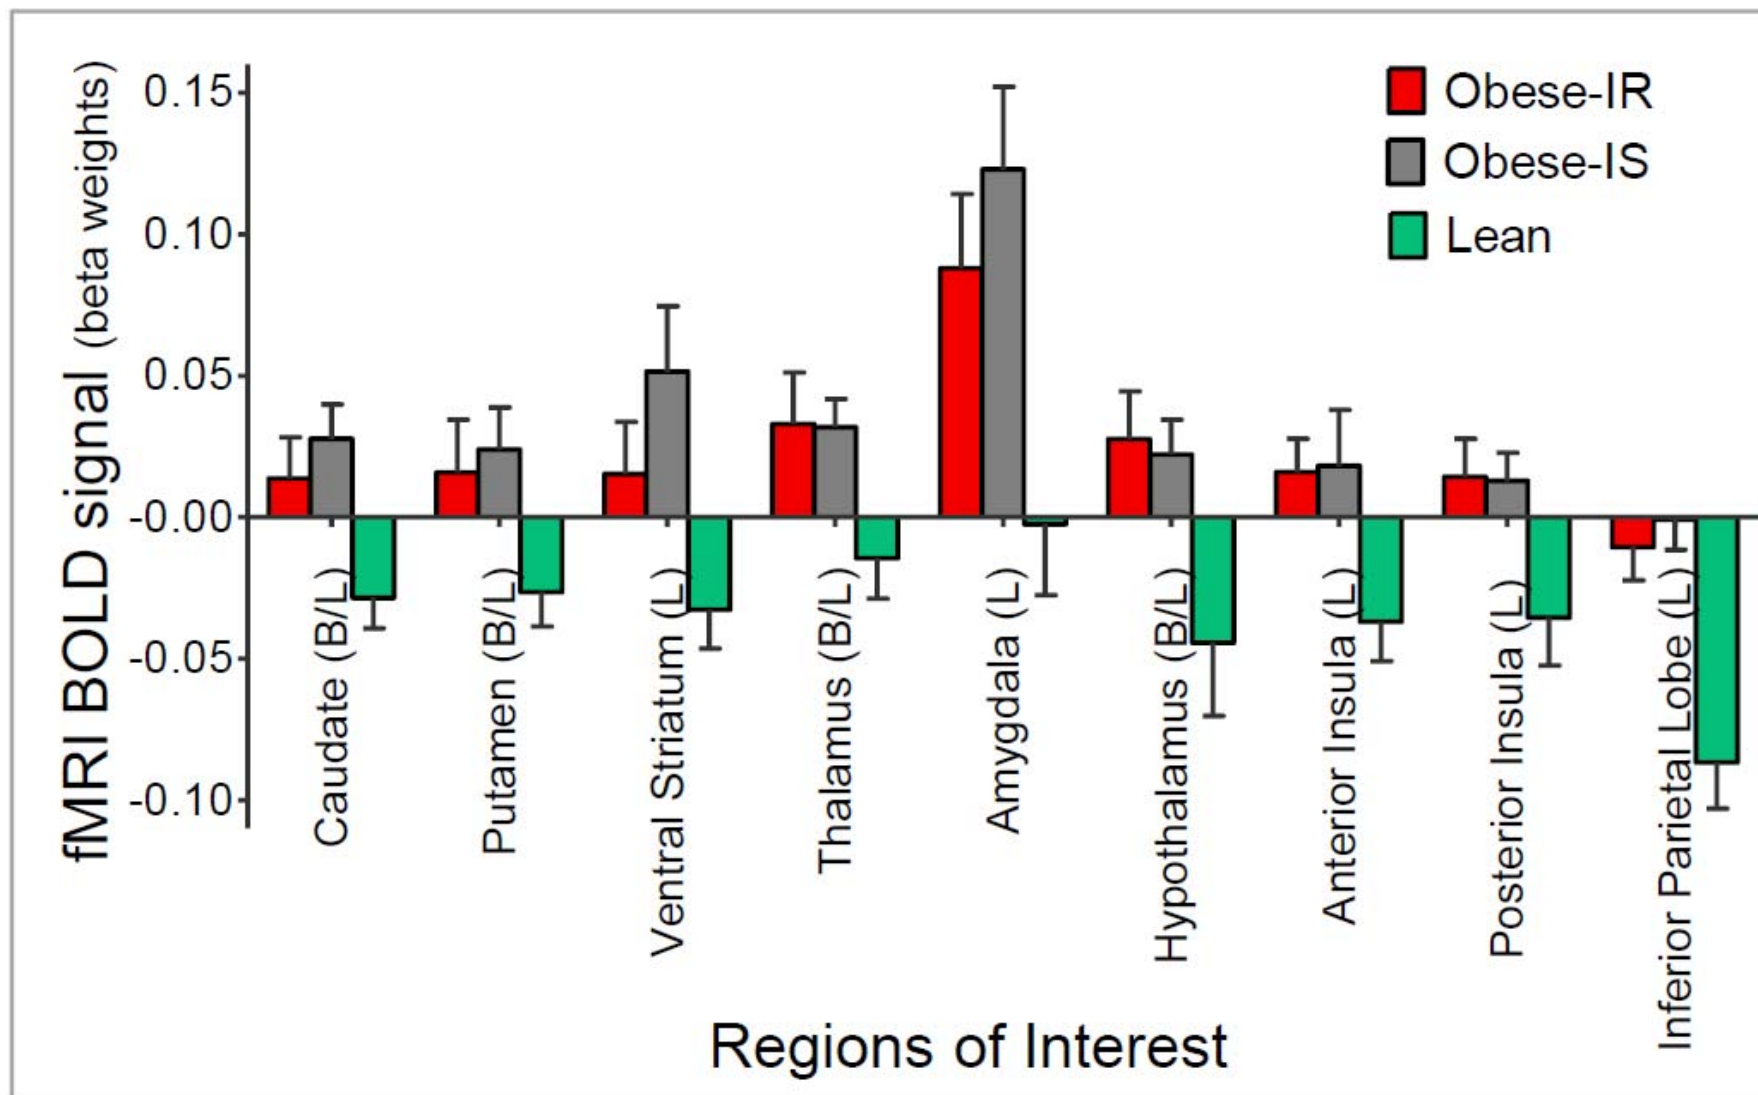

SUPPLEMENTARY DATA

**Supplementary Table 1. Regional brain activation.** Observed in between-condition contrast A) High-calorie food vs. Non-food, B) Low-calorie food vs. Non-food, C) High-calorie food vs. Low-calorie food.

| <b>(A) High-calorie food vs. Non-food (p=0.05)</b>                                                             |                               |                   |                                |                     |                                  |                     |                        |
|----------------------------------------------------------------------------------------------------------------|-------------------------------|-------------------|--------------------------------|---------------------|----------------------------------|---------------------|------------------------|
| <b>Obese vs. Lean adolescents</b>                                                                              | <b>Broadmann Area</b>         | <b>Laterality</b> | <b>Volume (mm<sup>3</sup>)</b> | <b>Vol (voxels)</b> | <b>Coordinates (Center Mass)</b> | <b>Mean T-Value</b> | <b>d (effect size)</b> |
| Caudate, thalamus, putamen, nucleus accumbens, insula, amygdala, and hypothalamus                              |                               | bilateral         | 13911                          | 515.2222222         | -6.1,2                           | 2.38                | 0.532188457            |
| Amygdala                                                                                                       |                               | left              | 546                            | 20.22222222         | -23.0,-14                        | 2.409               | 0.538673107            |
| Ventral striatum                                                                                               |                               | left              | 160                            | 5.925925926         | -13.8,-7                         | 2.421               | 0.54135641             |
| Hypothalamus                                                                                                   |                               | bilateral         | 422                            | 15.62962963         | 1,-4,-3                          | 2.269               | 0.507367903            |
| Caudate                                                                                                        |                               | bilateral         | 3141                           | 116.3333333         | -5.11,5                          | 2.589               | 0.578922654            |
| Anterior Insula                                                                                                |                               | left              | 171                            | 6.333333333         | -32.10,-10                       | 2.332               | 0.521455245            |
| Thalamus                                                                                                       |                               | bilateral         | 1602                           | 59.33333333         | -8,-18,7                         | 2.195               | 0.490820867            |
| Putamen                                                                                                        |                               | bilateral         | 830                            | 30.74074074         | 5,5,2                            | 2.245               | 0.502001297            |
| Hippocampus, primary auditory cortex, and primary motor cortex                                                 | 6,44,47                       | left              | 7041                           | 260.7777778         | -43,-10,3                        | 2.344               | 0.524138548            |
| Posterior Insula                                                                                               |                               | left              | 907                            | 33.59259259         | -38,-20,8                        | 2.327               | 0.520337202            |
| Whitematter                                                                                                    | 40                            | right             | 9584                           | 354.962963          | 21,-29,23                        | 2.357               | 0.52704546             |
| Primary sensory cortex, primary motor cortex                                                                   | 39,40                         | left              | 12137                          | 449.5185185         | -47,-49,33                       | 2.595               | 0.580264305            |
| Inferior Parietal Lobe                                                                                         |                               | left              | 10895                          | 403.5185185         | -47,-52,33                       | 2.638               | 0.589879475            |
| <b>Obese adolescents</b>                                                                                       | <b>Broadmann Area</b>         | <b>Laterality</b> | <b>Volume (mm<sup>3</sup>)</b> | <b>Vol (voxels)</b> | <b>Coordinates (Center Mass)</b> | <b>Mean T-Value</b> | <b>d (effect size)</b> |
| Fusiform, cerebellum, brainstem, thalamus, caudate, hippocampus, amygdala, insula                              | 17,18,19                      | bilateral         | 156804                         | 5807.555556         | -1,-62,-2                        | 3.348               | 0.6896                 |
| Hippocampus, amygdala, insula                                                                                  |                               | right             | 11633                          | 430.8518519         | 28,-12,-7                        | 2.817               | 0.5634                 |
| Middle and superior temporal gyrus                                                                             | 21,22,39                      | left              | 15678                          | 580.6666667         | -49,-54,15                       | -2.639              | -0.5278                |
| Fusiform gyrus                                                                                                 | 19,22,39                      | right             | 11611                          | 430.037037          | 48,-53,20                        | -2.614              | -0.5228                |
| Posterior cingulate, primary motor cortex, and primary sensory cortex                                          | 6,7,8,9                       | bilateral         | 51499                          | 1907.37037          | 13,-34,39                        | -2.7                | -0.54                  |
| Primary sensory and primary motor cortex                                                                       | 6,7,40                        | left              | 7375                           | 273.1481481         | -40,-27,50                       | 2.877               | 0.5754                 |
| <b>Lean adolescents</b>                                                                                        | <b>Broadmann Area</b>         | <b>Laterality</b> | <b>Volume (mm<sup>3</sup>)</b> | <b>Vol (voxels)</b> | <b>Coordinates (Center Mass)</b> | <b>Mean T-Value</b> | <b>d (effect size)</b> |
| Parahippocampus, fusiform gyrus, anterior and posterior cingulate, primary sensory, motor, and auditory cortex | 6,8,9,18,19,20,21,22,38,39,40 | bilateral         | 244213                         | 9044.925926         | 5,-29,25                         | -2.866              | -0.640862235           |
| Primary visual cortex and cerebellum                                                                           | 18                            | bilateral         | 59575                          | 2206.481481         | 0,-78,0                          | 3.41                | 0.762505311            |
| Primary auditory cortex                                                                                        | 10,44,45,47                   | left              | 12002                          | 444.5185185         | -41,16,4                         | -2.747              | -0.614252812           |
| <b>(B) Low-calorie food vs. Non-food (p=0.05)</b>                                                              |                               |                   |                                |                     |                                  |                     |                        |
| <b>Obese vs. Lean adolescents</b>                                                                              | <b>Broadmann Area</b>         | <b>Laterality</b> | <b>Volume (mm<sup>3</sup>)</b> | <b>Vol (voxels)</b> | <b>TalCoordCenterMass</b>        | <b>Mean T-Value</b> | <b>d (effect size)</b> |
| Caudate, thalamus, brainstem, hippocampus, and hypothalamus                                                    |                               | bilateral         | 13771                          | 510.037037          | 0,-12,-4                         | 2.261               | 0.505579034            |
| Caudate                                                                                                        |                               | left              | 2025                           | 75                  | -11,8,6                          | 2.297               | 0.513628944            |
| Caudate                                                                                                        |                               | right             | 699                            | 25.88888889         | 10,13,1                          | 2.188               | 0.489255607            |
| Thalamus                                                                                                       |                               | left              | 1263                           | 46.77777778         | -11,-13,4                        | 2.268               | 0.507144295            |
| Hypothalamus                                                                                                   |                               | left              | 136                            | 5.037037037         | -3,-5,-5                         | 2.206               | 0.493280562            |
| Hypothalamus                                                                                                   |                               | right             | 75                             | 2.777777778         | 4,-8,-6                          | 2.098               | 0.469130833            |
| Hippocampus                                                                                                    |                               | right             | 1072                           | 39.7037037          | 30,-26,-6                        | 2.249               | 0.502895731            |
| <b>Obese adolescents</b>                                                                                       | <b>Broadmann Area</b>         | <b>Laterality</b> | <b>Volume (mm<sup>3</sup>)</b> | <b>Vol (voxels)</b> | <b>TalCoordCenterMass</b>        | <b>Mean T-Value</b> | <b>d (effect size)</b> |
| Posterior cingulate, fusiform gyrus                                                                            | 7,18,19                       | bilateral         | 43052                          | 1594.518519         | 0,-51,19                         | -2.827              | -0.5654                |
| Hippocampus, amygdala, insula, putamen, caudate, thalamus, brainstem                                           |                               | left              | 20898                          | 774                 | -19,-9,0                         | 2.656               | 0.5312                 |
| Fusiform gyrus                                                                                                 | 19,21,39                      | left              | 18708                          | 692.8888889         | -49,-55,12                       | -2.777              | -0.5554                |
| Fusiform gyrus, cerebellum                                                                                     | 17,18,19                      | bilateral         | 72420                          | 2682.222222         | 0,-79,0                          | 3.561               | 0.7122                 |
| Fusiform gyrus                                                                                                 | 19,21,39                      | right             | 10108                          | 374.3703704         | 47,-57,15                        | -2.545              | -0.509                 |
| Anterior cingulate, primary sensory and primary motor cortex                                                   | 6                             | right             | 13273                          | 491.5925926         | 33,-19,50                        | -2.607              | -0.5214                |
| <b>Lean adolescents</b>                                                                                        | <b>Broadmann Area</b>         | <b>Laterality</b> | <b>Volume (mm<sup>3</sup>)</b> | <b>Vol (voxels)</b> | <b>TalCoordCenterMass</b>        | <b>Mean T-Value</b> | <b>d (effect size)</b> |
| Parahippocampus, posterior cingulate, and fusiform gyrus                                                       | 19                            | right             | 14676                          | 543.5555556         | 19,-41,0                         | -3.092              | -0.798351038           |
| Fusiform gyrus, posterior cingulate gyrus                                                                      | 18,19,39                      | left              | 28722                          | 1063.777778         | -35,-54,12                       | -2.828              | -0.730186525           |
| Fusiform gyrus, cerebellum                                                                                     | 17,18,19                      | bilateral         | 30244                          | 1120.148148         | 4,-78,0                          | 3.051               | 0.787764883            |
| Fusiform gyrus                                                                                                 | 19,21,39                      | right             | 9837                           | 364.3333333         | 52,-59,20                        | -2.575              | -0.684862201           |
| <b>(C) High-calorie food vs. Low-calorie food (p=0.05)</b>                                                     |                               |                   |                                |                     |                                  |                     |                        |
| <b>Obese vs. Lean adolescents</b>                                                                              | <b>Broadmann Area</b>         | <b>Laterality</b> | <b>Volume (mm<sup>3</sup>)</b> | <b>Vol (voxels)</b> | <b>TalCoordCenterMass</b>        | <b>Mean T-Value</b> | <b>d (effect size)</b> |
| none                                                                                                           |                               |                   |                                |                     |                                  |                     |                        |
| <b>Obese adolescents</b>                                                                                       | <b>Broadmann Area</b>         | <b>Laterality</b> | <b>Volume (mm<sup>3</sup>)</b> | <b>Vol (voxels)</b> | <b>TalCoordCenterMass</b>        | <b>Mean T-Value</b> | <b>d (effect size)</b> |
| Hippocampus, parahippocampus, amygdala, cerebellum, and fusiform gyrus                                         | 7,18,19,39                    | bilateral         | 79699                          | 2951.814815         | 6,-54,-2                         | 2.705               | 0.541                  |
| Visual cortex, angular gyrus, sensory association cortex                                                       | 7,19,39                       | left              | 7503                           | 277.8888889         | -26,-64,36                       | 2.512               | 0.5024                 |
| <b>Lean adolescents</b>                                                                                        | <b>Broadmann Area</b>         | <b>Laterality</b> | <b>Volume (mm<sup>3</sup>)</b> | <b>Vol (voxels)</b> | <b>TalCoordCenterMass</b>        | <b>Mean T-Value</b> | <b>d (effect size)</b> |
| Hippocampus, hypothalamus, parahippocampus, and fusiform gyrus                                                 |                               | right             | 7818                           | 289.5555556         | 29,-36,-9                        | 2.708               | 0.699202856            |

SUPPLEMENTARY DATA

**Supplementary Table 2. Correlations with Leptin in all subjects with whole brain corrected brain maps.** Correlation in the following regions: a) hypothalamus, b) caudate, c) amygdala, d) hippocampus, e) parahippocampus, f) anterior insula.

|                                                                                                                                                              | Broadmann Ar | Laterality | Volume (mm <sup>3</sup> ) | Vol (voxels) | Coordinates (Center Mass) |
|--------------------------------------------------------------------------------------------------------------------------------------------------------------|--------------|------------|---------------------------|--------------|---------------------------|
| Caudate, putamen, insula, thalamus, hippocampus, amygdala, brain stem, cerebellum, posterior and anterior cingulate gyrus, auditory and primary motor cortex | 6,7          |            | 71339                     | 2642.185185  | 0,-27,5                   |
| <i>Hypothalamus</i>                                                                                                                                          |              |            | 573                       | 21.22222222  | 0,-4,-1                   |
| <i>Caudate</i>                                                                                                                                               |              |            | 3726                      | 138          | -5,11,7                   |
| <i>Putamen</i>                                                                                                                                               |              |            | 1551                      | 57.44444444  | -11,2,1                   |
| <i>Thalamus</i>                                                                                                                                              |              |            | 1023                      | 37.88888889  | -15,-17,5                 |
| <i>Hippocampus</i>                                                                                                                                           |              |            | 2711                      | 100.4074074  | 4,-18,-11                 |
| <i>Amygdala</i>                                                                                                                                              |              |            | 791                       | 29.2962963   | -6,-2,-16                 |
| <i>Parahippocampus</i>                                                                                                                                       |              |            | 3299                      | 122.1851852  | 1,-33,-6                  |
| <i>Anterior insula</i>                                                                                                                                       |              |            | 321                       | 11.88888889  | -29,8,-10                 |
| <i>Posterior insula</i>                                                                                                                                      |              |            | 991                       | 36.7037037   | -34,-22,7                 |
| <i>Posterior cingulate</i>                                                                                                                                   |              |            | 4810                      | 178.1481481  | -1,-47,32                 |
| Angular Gyrus                                                                                                                                                | 39           | left       | 6290                      | 232.962963   | -46,-58,31                |



## SUPPLEMENTARY DATA

### References

1. Nolf E: XMedCon - An open-source medical image conversion toolkit. *European Journal of Nuclear Medicine* 2003;Vol. 30:pp S246
2. Joshi A, Scheinost D, Okuda H, Belhachemi D, Murphy I, Staib LH, Papademetris X: Unified framework for development, deployment and robust testing of neuroimaging algorithms. *Neuroinformatics* 2011;9:69-84
3. Holmes CJ, Hoge R, Collins L, Woods R, Toga AW, Evans AC: Enhancement of MR images using registration for signal averaging. *Journal of computer assisted tomography* 1998;22:324-333
4. Evans AC, Collins DL, Mills SR, Brown ED, Kelly RL, Peters TM: 3D statistical neuroanatomical models from 305 MRI volumes. *Proc IEEE Nucl Sci Symp Med Imaging Conf* 1993;pp. 1813–1817
